# Supplementary material for: Review of key causes and sources for N 2 O emissions and NO 3 -leaching from organic arable crop rotations
Source: Copernicus journal article supplement (doi:10.5194/bg-2018-455), 2018-11-27
Supplement: Supplementary file 1 [file S1 _ S2_S3 Supplementary material .xlsx]

## Sheet: S1_SMN
Crop	Forecrop	Crop rotation	No of years	Site	Soil tillage	N fertilization/Organic matter input	Soil layer in cm	% Clay/Sand	Average content of Nmin in soil (kg ha-1) in late autumn	Average content of Nmin in soil (kg ha-1) in early spring	Possible cause of high N concentrations	Reference
Winter wheat	Grass-clover 2nd year	Maize (for silage) Oat/barley/wheat/pea Grass-clover 1st year Grass-clover 2nd year Winter wheat	5	Grabów, PL	Conventional tillage	Compost before maize (30 t/ha) Grass-clover residues incorporated in late August Post-harvest residues of other crops	0-30	15/50	46	45	n/a	Jończyk and Martyniuk, 2017
							30-60	15/50	25	42
							60-90	30/55	12	59
Winter wheat	Pea	Maize (for grain) Spring barley Oat/barley/wheat/pea Pea Winter wheat			Conventional tillage	Compost (30 t/ha) before maize Post-harvest residues of all crops	0-30	15/50	52	36	Intensive mineralization of pea residues and poor synchrony between N available and uptaken by winter wheat.
							30-60	15/50	43	38
							60-90	30/55	20	20
Winter wheat	Red clover	Maize (for grain) Oat/barley/wheat Spring wheat Red clover Winter wheat			Conventional tillage	Compost (30 t/ha) before maize Post-harvest residues of all crops	0-30	15/50	51	42	Intensive mineralization of 2 years ley residues and poor synchrony between N available and uptaken by winter wheat.
							30-60	15/50	29	42
							60-90	30/55	13	30
Grass-clover, 3 cuts mulched	Barley	Barley with green manure undersown/green manure /barley	1	Kvithamar, NO	Ploughing in spring before new crop	No fertilizers. Barley straw removed.	0-30	30/3	28	46	n/a	Frøseth et al., 2014
							30-60	37/0	6.8	15
							60-80	37/0	1.8	3.6
Grass-clover, 3 cuts removed	Barley		1			No fertilizers. Barley straw removed.	0-30	30/3	14	37
							30-60	37/0	3.6	8.4
							60-80	37/0	1.6	2.6
Oats	Barley	Barley/oats/barley	1			No fertilizers. Barley straw removed.	0-30	30/3	15	29
							30-60	37/0	5.2	8.25
							60-80	37/0	2.2	3.5
Barley	Grass-clover, 3 cuts mulched	Barley with green manure undersown/green manure /barley	1			No fertilizers.	0-30	30/3	13	19
							30-60	37/0	7.9	12
							60-80	37/0	4.5	6.3
Barley	Grass-clover, 3 cuts removed		1			No fertilizers.	0-30	30/3	11	20
							30-60	37/0	4.5	10.6
							60-80	37/0	3.7	4.4
Barley	Grass-clover, 3 cuts removed		1			110 kg/ha of herbage-based digestate	0-30	30/3	10	17
							30-60	37/0	5.5	7.6
							60-80	37/0	4.1	4.2
Barley	Oats	Barley/oats/barley	1			110 kg/ha of herbage-based digestate	0-30	30/3	10	16
							30-60	37/0	5.8	7.4
							60-80	37/0	3.6	4.9
Grass-clover, 3 cuts mulched	Barley	Barley with green manure undersown/green manure /barley	1	Værnes, NO	Ploughing in spring before new crop	No fertilizers. Barley straw removed.	0-30	6/51	21	34	n/a	Frøseth et al., 2014
							30-60	2/73	5.4	7.1
							60-80	1/92	2	4
Grass-clover, 3 cuts removed	Barley		1			No fertilizers. Barley straw removed.	0-30	6/51	11	23
							30-60	2/73	3.4	4.1
							60-80	1/92	0.9	0.9
Oats	Barley	Barley/oats/barley	1			No fertilizers. Barley straw removed.	0-30	6/51	8	20
							30-60	2/73	3.4	5
							60-80	1/92	1.4	1.2
Barley	Grass-clover, 3 cuts mulched	Barley with green manure undersown/green manure /barley	1			No fertilizers.	0-30	6/51	15	23
							30-60	2/73	12.2	10.9
							60-80	1/92	10.3	4.1
Barley	Grass-clover, 3 cuts removed		1			No fertilizers.	0-30	6/51	13	23
							30-60	2/73	9.1	9.1
							60-80	1/92	10.4	4.5
Barley	Grass-clover, 3 cuts removed		1			110 kg/ha of herbage-based digestate	0-30	6/51	14	22
							30-60	2/73	10.9	9.4
							60-80	1/92	9.5	3.9
Barley	Oats	Barley/oats/barley	1			110 kg/ha of herbage-based digestate	0-30	6/51	20	18
							30-60	2/73	4.75	6.4
							60-80	1/92	0.95	2.8
Grass-clover, 3 cuts mulched	Barley	Barley with green manure undersown/green manure /barley	1	Apelsvoll, NO	Ploughing in spring before new crop	No fertilizers. Barley straw removed.	0-30	14/55	15	24	n/a	Frøseth et al., 2014
							30-60	15/53	3	7.9
							60-80	NA	1.3	3.2
Grass-clover, 3 cuts removed	Barley		1			No fertilizers. Barley straw removed.	0-30	14/55	14	16
							30-60	15/53	3.4	4.4
							60-80	NA	1.4	1.3
Oats	Barley	Barley/oats/barley	1			No fertilizers. Barley straw removed.	0-30	14/55	23	12
							30-60	15/53	9	8.2
							60-80	NA	2.2	4
Barley	Grass-clover, 3 cuts mulched	Barley with green manure undersown/green manure /barley	1			No fertilizers.	0-30	14/55	17	35
							30-60	15/53	12.8	20.9
							60-80	NA	6.4	6
Barley	Grass-clover, 3 cuts removed		1			No fertilizers.	0-30	14/55	17	32
							30-60	15/53	12.7	18.8
							60-80	NA	6.3	0
Barley	Grass-clover, 3 cuts removed		1			110 kg/ha of herbage-based digestate	0-30	14/55	17	31
							30-60	15/53	11.4	19.5
							60-80	NA	6.2	0
Barley	Oats	Barley/oats/barley	1			110 kg/ha of herbage-based digestate	0-30	14/55	12	27
							30-60	15/53	8.4	14
							60-80	NA	4.4	0
Grass-clover, 3 cuts mulched	Barley	Barley with green manure undersown/green manure /barley	1	Ås, NO	Ploughing in spring before new crop	No fertilizers. Barley straw removed.	0-30	25/22	11	24	n/a	Frøseth et al., 2014
							30-60	40/14	1.4	5.7
							60-80	39/15	0.9	3.6
Grass-clover, 3 cuts removed	Barley		1			No fertilizers. Barley straw removed.	0-30	25/22	9	14
							30-60	40/14	1.5	4.6
							60-80	39/15	1.1	3.9
Oats	Barley	Barley/oats/barley	1			No fertilizers. Barley straw removed.	0-30	25/22	9	17
							30-60	40/14	2.3	4.75
							60-80	39/15	1.3	3.9
Barley	Grass-clover, 3 cuts mulched	Barley with green manure undersown/green manure /barley	1			No fertilizers.	0-30	35/22	16	31
							30-60	40/14	9.9	12.4
							60-80	39/15	4	6
Barley	Grass-clover, 3 cuts removed		1			No fertilizers.	0-30	35/22	16	25
							30-60	40/14	9.4	10.9
							60-80	39/15	3.5	5.7
Barley	Grass-clover, 3 cuts removed		1			110 kg/ha of herbage-based digestate	0-30	35/22	15	22
							30-60	40/14	7.1	9.8
							60-80	39/15	2.4	4.4
Barley	Oats	Barley/oats/barley	1			110 kg/ha of herbage-based digestate	0-30	35/22	15	16
							30-60	40/14	4.8	7
							60-80	39/15	1.5	4.1
Spring triticale with and witout catch crop	No data	Spring triticlae	1	Zawady, PL	No data	Farmyard manure 30t/ha	0-30	<10/80	45.99	54	n/a	Płaza et al., 2015
							30-60	<10/80	26	38
		Spring triticlae/Catch crop (White melilot)					0-30	<10/80	28	108	Priming effect of incorporated biomass from a catch crop
							30-60	<10/80	15	28
		Spring triticlae/Catch crop (White melilot + westerwold ryegrass)					0-30	<10/80	23	95
							30-60	<10/80	12	25
		Spring triticlae/Catch crop (Westerwold ryegrass)					0-30	<10/80	18	81
							30-60	<10/80	10	23
		Spring triticlae/Catch crop (Westerwold ryegrass-mulched in spring)					0-30	<10/80	28	95
							30-60	<10/80	14	23
		Spring triticlae/Catch crop (White melilot + westerwold ryegrass-mulched in spring)					0-30	<10/80	23	83
							30-60	<10/80	12	20
		Spring triticlae/Catch crop (Westerwold ryegrass-mulched in spring)					0-30	<10/80	18	71
							30-60	<10/80	10	16

## Sheet: S2-N2O
	Soil Texture							Legumes in the crop, crop residues or undersown		N i crop residues	total N applied with manure or other fertilization		Mean daily precipitation in the period	Irrigation, mm and date	Mean temperature in the period	freezing / thawing	cumulated emission in the period	Mean in the period	Highest daily flux rate	2nd highest daily flux rate	3rd highest daily flux rate	4th highest daily flux rate	5th highest daily flux rate	% contribution of the highest daily fluxes to cumulated emissions in the period	% contribution of the 5 highest daily fluxes to cumulated emissions in the period	During the day at highest flux rate					Reference
Site	% Clay	% Sand	Soil pH	SOC (g kg-1 dry soil)	name of treatment in the paper	Crop	Dates for additions of organic matter and source		Tillage	Kg N ha-1	Kg N ha-1	Measurement period (days)	mm	mm	° C		g N2O-N ha-1	g N2O-N ha-1day-1								Date	%WFPS	kg NO3-N / ha	kg NH4-N / ha	soil temp °C
Frick, CH	45	28	7.1 (H2O)	22.3	CTxSL	Grass-clover	4 Jun, 24 Jul CS	+	none	?	115.159	18.09.12 - 22.09.13 (369)	0.422764		10.96	-	819.79	2.22165	53.92	32.0348	19.0586	11.9785	11.1403	6.57729	15.6299	2013-06-05	73.8276	10.7318	3.77136	14.85	Krauss et al., 2017
Frick, CH	45	28	7.1 (H2O)	24.4	CTxMC	Grass-clover	19 Mar CCM + 4 Jun CS + 24 Jul CS	+	none	?	119.787	18.09.12 - 22.09.13 (369)	0.422764		10.96	-	823.25	2.23103	48.1275	27.8679	12.676	12.4274	7.07481	5.84603	13.1398	2013-07-19	59.2144	28.309	3.76844	21.44
Frick, CH	45	28	7.1 (H2O)	28	RTxSL	Grass-clover	4 Jun CS + 24 Jul CS	+	none	?	115.159	18.09.12 - 22.09.13 (369)	0.422764		10.96	-	749.33	2.0307	106.31	19.8997	19.2581	11.7466	10.6472	14.1874	22.4016	2013-06-05	73.655	11.3872	2.99958	14.85
Frick, CH	45	28	7.1 (H2O)	29.9	RTxMC	Grass-clover	19 Mar CCM + 4 Jun CS + 24 Jul CS	+	none	?	119.787	18.09.12 - 22.09.13 (369)	0.422764		10.96	-	888.15	2.40691	51.5356	12.3342	11.5242	9.93642	9.11518	5.80258	10.634	2013-06-05	73.1757	10.8708	2.48483	14.85
Frick, CH	45	28	7.1 (H2O)	22.3	CTxSL	Winter wheat	9 Oct ley residues + 19 Mar CS + 9 Apr CS	+	9th Oct Ploughing	127.265	125.659	22.09.13 - 15.07.14 (296)	0.222973		8.96	-	2065.92	6.97946	79.0071	54.9484	49.1497	44.5395	36.1619	3.82431	12.7695	2013-10-21	78.7959	9.07488	3.12414	12.45
Frick, CH	45	28	7.1 (H2O)	24.4	CTxMC	Winter wheat	9 Oct ley residues +11 Mar CCM + 19 Mar CS + 9 Apr CS	+	9th Oct Ploughing	74.8301	155.16	22.09.13 - 15.07.14 (296)	0.222973		8.96	-	2957.7	9.99223	206.524	70.3821	60.0044	38.5486	36.8887	6.98258	13.9415	2013-10-21	77.6628	9.44534	1.64267	12.45
Frick, CH	45	28	7.1 (H2O)	28	RTxSL	Winter wheat	9 Oct ley residues + 19 Mar CS + 9 Apr CS	+	20th Oct Rotary tiller	65.7418	125.659	22.09.13 - 15.07.14 (296)	0.222973		8.96	-	2271.41	7.67368	68.8814	56.5007	49.7836	48.9837	39.559	3.03254	11.6099	2014-03-23	79.8925	16.1708	5.73329	8.94
Frick, CH	45	28	7.1 (H2O)	29.9	RTxMC	Winter wheat	9 Oct ley residues +11 Mar CCM + 19 Mar CS + 9 Apr CS	+	20th Oct Rotary tiller	59.1831	155.16	22.09.13 - 15.07.14 (296)	0.222973		8.96	-	2800.05	9.45963	79.6557	55.8622	53.0842	46.5395	42.5703	2.8448	9.91811	2013-10-07	66.5645	15.6853	4.79031	15.84
Frick, CH	45	28	7.1 (H2O)	22.3	CTxSL	Cover Crop seeding	25 aug Wheat residues + weed	+	25th Aug Rotary tiller	?	0	15.07.14 - 18.09.14 (65)	0.4		16.95	-	1622.43	24.9605	219.008	31.003	30.9062	13.2771	9.24144	13.4988	18.7026	2014-09-05	79.7958	12.9921	0.626125	18.85
Frick, CH	45	28	7.1 (H2O)	24.4	CTxMC	Cover Crop seeding	25 aug Wheat residues + weed	+	25th Aug Rotary tiller	?	0	15.07.14 - 18.09.14 (65)	0.4		16.95	-	2603.97	40.0611	380.14	62.4108	46.2669	13.5211	12.1602	14.5985	19.7583	2014-09-05	78.9108	9.25691	0	18.85
Frick, CH	45	28	7.1 (H2O)	28	RTxSL	Cover Crop seeding	25 aug Wheat residues + weed	+	25th Aug Rotary tiller	?	0	15.07.14 - 18.09.14 (65)	0.4		16.95	-	3116.96	47.9532	532.28	63.4477	54.4682	13.793	12.256	17.0769	21.6956	2014-09-05	80.735	16.1744	1.66279	18.85
Frick, CH	45	28	7.1 (H2O)	29.9	RTxMC	Cover Crop seeding	25 aug Wheat residues + weed	+	25th Aug Rotary tiller	?	0	15.07.14 - 18.09.14 (65)	0.4		16.95	-	3445.19	53.0029	604.549	61.4998	39.2409	15.3765	12.9318	17.5476	21.2934	2014-09-05	79.9117	12.2561	0	18.85
Foulum, DK	9	78	6.5 (CaCl2)	23	O4-CC+M	Spring barley	around 15 Apr PS	-	Ploughing+harrowing	?	57 (2008) + 61 (2009)	14.04.08 - 27.03.09 (347)	1.81268		8.2	+	800	2.30548	10.6262	10.6262	8.64	7.38207	6.58759	1.32828	5.48276	2008-04-30	46.25	57.8	24.4	11	Pugesgaard et al., 2017
Foulum, DK	9	78	6.5 (CaCl2)	23	O4-CC+M	Fava bean	None	+	Ploughing+harrowing	?	0	14.04.08 - 27.03.09 (347)	1.81268		8.2	+	1100	3.17003	10.1405	9.09046	8.79674	5.48456	5.50701	0.921867	3.54721	2008-08-13	50.75	15.5	3	15.9
Foulum, DK	9	78	6.5 (CaCl2)	23	O4-CC+M	Potato	around 15 Apr PS	-	Ploughing+harrowing	?	113 (2008) + 112 (2009)	14.04.08 - 27.03.09 (347)	1.81268		8.2	+	800	2.30548	14.906	9.12821	6.87179	6.08547	3.21368	1.86325	5.02564	2008-05-29	44.375	45.2	8.1	12.1
Foulum, DK	9	78	6.5 (CaCl2)	23	O4-CC+M	Winter wheat	around 15 Apr PS	-	13 Sep P+H, 24 Sep H, 15+24 Apr+ 8 May H	?	108 (2008)+ 112 (2009)	14.04.08 - 27.03.09 (347)	1.81268		8.2	+	900	2.59366	17.6683	7.68628	6.19855	4.18228	4.08424	1.96314	4.4244	2008-05-06	56.9245	22.0311	15.1359	10.7
Foulum, DK	9	78	6.5 (CaCl2)	24	FO/O4-CC	Winter wheat	15 Apr PS	-	13 Sep P+H, 24 Sep H, 15+24 Apr+ 8 May H	?	108	26.09.07 - 26.09.08 (365)				-	678.9	1.86	17.6783	6.70196	6.06629	5.70147	4.22286	2.60396	5.94652	2008-05-06	56.9245	22.0311	15.1359	11	Chirinda et al., 2010
Flakk, DK	16	72	7.4 (CaCl2)	9.5	FL/O4-CC	Winter wheat	22 Apr PS	-	2 Oct P, 3 Oct H, 14 Apr H	?	101	05.10.07 - 13.08.08 (313)				-	707.38	2.26	12.0281	9.16916	8.06742	8.14943	5.74239	1.70037	6.10089	2007-10-03	35.2	13.6715	2.4414	11.7
Foulum, DK	9	78	6.5 (CaCl2)	20.1	FO/O4+CC	Winter wheat	CCs + 15 Apr PS	?	13 Sep P+H, 24 Sep H, 15+24 Apr+ 8 May H	?	108	26.09.07 - 26.09.08 (365)				-	810.3	2.22	13.1632	8.08344	7.28834	5.96319	5.69816	1.62448	4.96067	2008-05-06	51.9795	17.4428	6.6339	11
Flakk, DK	16	72	7.4 (CaCl2)	9.2	FL/O4+CC	Winter wheat	CCs + 22 Apr PS	?	2 Oct P, 3 Oct H, 14 Apr H	?	101	05.10.07 - 13.08.08 (313)				-	538.36	1.72	12.125	7.38386	7.17865	6.61942	5.55707	2.25221	7.21896	2007-10-03	44	13.6	2.7	11.2
Foulum, DK	9	78	6.5 (CaCl2)	23.9	FO/O2+CC	Winter wheat	ley residues + CCs + 15 Apr digested PS	+	13 Sep P+H, 24 Sep H, 15+24 Apr+ 8 May H	?	102	26.09.07 - 26.09.08 (365)				-	631.45	1.73	10.8783	5.7389	5.51926	5.32187	3.38001	1.72275	4.88373	2008-05-06	59	21.7425	8.50785	11
Flakk, DK	16	72	7.4 (CaCl2)	9.9	FL/O2+CC	Winter wheat	ley residues + CCs + 22 Apr PS	+	2 Oct P, 3 Oct H, 14 Apr H	?	101	05.10.07 - 13.08.08 (313)				-	801.28	2.56	14.1235	11.3806	9.91851	9.70852	3.52113	1.76262	6.07182	2007-10-31	83.144	4.84185	3.31695	7.1
Foulum, DK	9	78	6.5 (CaCl2)	23	SB-M	Spring barley	14 Apr CCinc, 22 May CCs	+	14-6 Apr P, 10,16,21 Apr, 2, 13, 21 May H	?	0	17.04.08 - 16.04.09 (365)	1.69041	30 (26-29.5)	8.4	+	1400	3.83562	56.1604	31.9443	28.9226	5.78016	4.78726	4.01146	9.11391	2008-05-07	46.5	61.6	10.8	19.5	Brozyna et al., 2013
Foulum, DK	9	78	6.5 (CaCl2)	23	GC-M	Grass-clover	Grass-clover ley mulched	+		?	0	17.04.08 - 16.04.09 (365)	1.69041	30 (26-29.5)	8.4	+	500	1.36986	7.25756	5.65506	2.65832	1.95827	1.43128	1.45151	3.7921	2008-09-02	58.3	5.7	4.9	16.5
Foulum, DK	9	78	6.5 (CaCl2)	23	PT-M	Potato	14 Apr ley residue and ley herbage	+	14-6 Apr P, 5 Mar, 10,16,28 Apr, 25 sep, 7 Oct H	?	0	17.04.08 - 16.04.09 (365)	1.69041	30 (26-29.5)	8.4	+	1300	3.56164	40.4245	24.7595	19.0874	14.2478	13.0112	3.10958	8.57927	2008-05-01	58.5	2.1	2	12.2
Foulum, DK	9	78	6.5 (CaCl2)	23	WW-M	Winter wheat	Potato residues	+	10,15,24 Apr, 8 May H	?	0	17.04.08 - 16.04.09 (365)	1.69041	30 (26-29.5)	8.4	+	500	1.36986	4.95427	2.66459	2.86394	2.5325	2.53467	0.990854	3.10999	2008-04-29	63	5.7	2.2	10
Foulum, DK	9	78	6.5 (CaCl2)	23	SB+M	Spring barley	16-17 Apr digested PS	+	14-6 Apr P, 10,16,21 Apr, 2, 13, 21 May H	?	57 + 61 (2009)	17.04.08 - 16.04.09 (365)	1.69041	30 (26-29.5)	8.4	+	900	2.46575	50.6411	31.4993	23.4033	3.88529	5.1587	5.62679	12.732	2008-05-07	48.1	141	16.5	21
Foulum, DK	9	78	6.5 (CaCl2)	23	GC+M	Grass-clover		+		?		17.04.08 - 16.04.09 (365)	1.69041	30 (26-29.5)	8.4	+	400	1.09589	7.05882	5.42986	2.53394	1.80995	1.26697	1.76471	4.52489	2008-09-02	65	9.6	4.2	15.3
Foulum, DK	9	78	6.5 (CaCl2)	23	PT+M	Potato	14 Apr Ley residues + 24-16 Apr digested PS	+	14-6 Apr P, 5 Mar, 10,16,28 Apr, 25 sep, 7 Oct H	?	113 + 112 (2009)	17.04.08 - 16.04.09 (365)	1.69041	30 (26-29.5)	8.4	+	1200	3.28767	35.8845	25.3825	16.3423	11.6759	9.5298	2.99037	8.23458	2008-05-01	59.8	2.9	2.5	14.8
Foulum, DK	9	78	6.5 (CaCl2)	23	WW+M	Winter wheat	15-16 Apr digested PS	+	10,15,24 Apr, 8 May H	?	108 + 112 (2009)	17.04.08 - 16.04.09 (365)	1.69041	30 (26-29.5)	8.4	+	500	1.36986	10.9293	3.23053	2.98112	2.92012	2.40291	2.18586	4.4928	2008-05-06	59	21.7425	8.50785	11
Foulum, DK	9	78	6.4 (CACl2)	23	CS+DDS	Spring barley	27 Apr CS + digested sewage sludge	-	21 Apr P	0	476	22.04.15 - 05.08.15 (105)	2.26667			-	1970	18.7619	77.595	56.1382	51.8363	43.2286	38.0412	3.93883	13.5451	2015-05-17	53	76.2165	24.8414	10.2	Baral et al., 2017
Foulum, DK	9	78	6.4 (CACl2)	23	CS	Spring barley	27 Apr CS	-	21 Apr P	0	191	22.04.15 - 05.08.15 (105)	2.26667			-	700	6.66667	57.6372	16.8289	7.09412	6.48905	4.05773	8.23389	13.1581	2015-05-17	56	122.01	5.88426	10.2
Foulum, DK	9	78	6.4 (CACl2)	23	PS	Spring barley	27 Apr PS	-	21 Apr P	0	152	22.04.15 - 05.08.15 (105)	2.26667			-	260	2.47619	11.271	9.63724	6.96772	5.22589	4.31036	4.33499	14.3893	2015-05-10	52	60.5898	69.5596	10.5
Foulum, DK	9	78	6.4 (CACl2)	23	MBD	Spring barley	27 Apr Digestate mixed livestock slurry	-	21 Apr P	0	167	22.04.15 - 05.08.15 (105)	2.26667			-	190	1.80952	8.00493	8.37416	4.0709	3.71737	2.21829	4.21312	13.8872	2015-05-25	52	99.1604	1.92814	11.7
Foulum, DK	9	78	6.4 (CACl2)	23	MIN	Spring barley	12 Apr (NH4)2SO4		21 Apr P	0	100	22.04.15 - 05.08.15 (105)	2.26667			-	190	1.80952	3.43113	3.44785	2.79457	2.06775	1.4436	1.80586	6.93941	2015-05-04	62	38.592	114.738	9.7
Foulum, DK	9	78	6.4 (CACl2)	23	Ctrl	Spring barley	0		21 Apr P	0	0	22.04.15 - 05.08.15 (105)	2.26667			-	20	0.190476	2.92578	1.93206	2.36141	2.79465	2.16062	14.6289	60.8726	2015-05-04	63	2.90831	1.04716	16.2
Foulum, DK	9	78	6.4 (CACl2)	23	CL H	Spring barley+CC:red clover	15 Mar 12 CS + 15 May 12 CCs + 30 Oct 12 CCh	+	19 Mar 12 P, 22 Apr 13 P	41	80 kg Min-N	10.09.12 - 10.09.13 (365)	1.72055		7.2	+	790	2.16438	9.61872	7.99484	7.96801	7.27955	5.31792	1.21756	4.83279	2013-05-23	45	63.6	0.5	11.1	Li et al., 2015
Foulum, DK	9	78	6.4 (CACl2)	23	GC H	Spring barley+CC:gras-clover	15 Mar 12 CS + 15 May 12 CCs + 30 Oct 12 CCh	+	19 Mar 12 P, 22 Apr 13 P	32	80 kg Min-N	10.09.12 - 10.09.13 (365)	1.72055		7.2	+	815	2.23288	12.5364	11.183	7.13324	6.33644	5.77643	1.53821	5.27185	2013-05-24	45	64.1	0.7	10.9
Foulum, DK	9	78	6.4 (CACl2)	23	WV H	Spring barley+CC:winter vetch	15 Mar 12 CS + 10 Aug 12 CCs + 30 Oct 12 CCh	+	19 Mar 12 P, 22 Apr 13 P	32	80 kg Min-N	10.09.12 - 10.09.13 (365)	1.72055		7.2	+	673	1.84384	8.51571	4.63433	3.50986	3.08785	2.91048	1.26534	3.36675	2013-02-25	55	24.2	1.6	-0.1
Foulum, DK	9	78	6.4 (CACl2)	23	GR H	Spring barley+CC:ryegrass	15 Mar 12 CS + 15 May 12 CCs + 30 Oct 12 CCh	-	19 Mar 12 P, 22 Apr 13 P	26	80 kg Min-N	10.09.12 - 10.09.13 (365)	1.72055		7.2	+	527	1.44384	31.1687	11.4743	6.94288	7.28475	5.7102	5.91436	11.8749	2013-02-25	46	25.8	0.2	15.6
Foulum, DK	9	78	6.4 (CACl2)	23	FR H	Spring barley+CC:fodder radish	15 Mar 12 CS + 10 Aug 12 CCs + 30 Oct 12 CCh	-	19 Mar 12 P, 22 Apr 13 P	23	80 kg Min-N	10.09.12 - 10.09.13 (365)	1.72055		7.2	+	1714	4.69589	16.4679	14.6719	7.5863	6.80603	6.10189	0.96079	3.01249	29.5.	46	25.8	0.2	15.6
Foulum, DK	9	78	6.4 (CACl2)	23	CO H	Spring barley	15 Mar CS + Weed killed by glyfosat	-	19 Mar 12 P, 22 Apr 13 P	31	80 kg Min-N	10.09.12 - 10.09.13 (365)	1.72055		7.2	+	623	1.70685	0.0734384	0.04976	0.0415901	0.0382442	0.0357896	0.0117879	0.0383343	25.2.	44	12.3	0.6	-0.1
Foulum, DK	9	78	6.4 (CACl2)	23	CL U	Spring barley+CC:red clover	15 Mar 12 CS + 15 May 12 CCs	+	19 Mar 12 P, 22 Apr 13 P	107	80 kg Min-N	10.09.12 - 10.09.13 (365)	1.72055		7.2	+	841	2.30411	16.3585	9.62375	9.36852	7.41628	6.64256	1.94512	5.8751	2013-05-15	46	83.2	2.3	10.8
Foulum, DK	9	78	6.4 (CACl2)	23	GC U	Spring barley+CC:gras-clover	15 Mar 12 CS + 15 May 12 CCs	+	19 Mar 12 P, 22 Apr 13 P	91	80 kg Min-N	10.09.12 - 10.09.13 (365)	1.72055		7.2	+	835	2.28767	16.8793	15.6225	14.6612	10.9882	5.29209	2.02147	7.59799	2013-05-23	46	77.5	1.4	11
Foulum, DK	9	78	6.4 (CACl2)	23	WV U	Spring barley+CC:winter vetch	15 Mar 12 CS + 10 Aug 12 CCs	+	19 Mar 12 P, 22 Apr 13 P	99	80 kg Min-N	10.09.12 - 10.09.13 (365)	1.72055		7.2	+	691	1.89315	10.3495	7.52595	7.43327	5.9873	4.53557	1.49776	5.18547	2013-02-25	58	26.7	1.6	-0.1
Foulum, DK	9	78	6.4 (CACl2)	23	GR U	Spring barley+CC:ryegrass	15 Mar 12 CS + 15 May 12 CCs	-	19 Mar 12 P, 22 Apr 13 P	66	80 kg Min-N	10.09.12 - 10.09.13 (365)	1.72055		7.2	+	509	1.39452	15.4611	8.51513	8.22866	8.35253	5.58633	3.03755	9.06557	29.5.	46	29.6	1.4	16.7
Foulum, DK	9	78	6.4 (CACl2)	23	FR U	Spring barley+CC:fodder radish	15 Mar 12 CS + 10 Aug 12 CCs	-	19 Mar 12 P, 22 Apr 13 P	45	80 kg Min-N	10.09.12 - 10.09.13 (365)	1.72055		7.2	+	1180	3.23288	20.4459	14.3728	7.9841	6.00977	5.90299	1.73271	4.63692	25.2.	46	11.1	0.7	-0.1
Foulum, DK	9	78	6.4 (CACl2)	23	CO U	Spring barley	15 Mar CS + Weed	-	19 Mar 12 P, 22 Apr 13 P	31	80 kg Min-N	10.09.12 - 10.09.13 (365)	1.72055		7.2	+	801	2.19452	0.0900863	0.0820835	0.0580763	0.0389772	0.0389368	0.0112467	0.0384719	2013-02-24	66	9.5	0.4	-0.1
Edinburgh, UK	15	49	6.6	58.8	Intercrop (BCF)	Spring Barley / white clover	0	+	Apr P, H	14	0	24.04.06 - 11.09.06 (140)	2.22571	0	12.7317	-	2777.94	19.8424	57.6079	52.781	52.4842	43.177	22.1011	2.07377	8.21296	2006-05-18					Pappa et al., 2011
Edinburgh, UK	15	49	6.6	58.8	Intercrop (BP)	Spring Barley / pea cv Zero 4	0	+	Apr P, H	20	0	24.04.06 - 11.09.06 (140)	2.22571	0	12.7317	-	743.556	5.31111	15.6501	14.6242	14.1756	10.0786	8.86479	2.10477	8.5257	2006-05-25
Edinburgh, UK	15	49	6.6	58.8	Intercrop (BP)	Spring Barley / pea cv Nitouche	0	+	Apr P, H	41	0	24.04.06 - 11.09.06 (140)	2.22571	0	12.7317	-	3345.1	23.8935	125.787	90.3449	62.5891	31.9116	27.6714	3.76035	10.1134	2006-05-18
Edinburgh, UK	15	49	6.6	58.8	Monocrop (BF)	Spring Barley	0	-	Apr P, H	9	0	24.04.06 - 11.09.06 (140)	2.22571	0	12.7317	-	876.466	6.26047	27.6944	22.9489	12.452	9.21228	9.08709	3.15978	9.28668	2006-05-31
Edinburgh, UK	15	49	6.6	58.8	Intercrop (BCF)	Winter	0	+	0	109	0	12.09.06 - 02.04.07 (202)	4.0901	0	6.51887	-	507.964	2.51468	14.5682	7.99368	5.78516	5.52806	5.35861	2.86796	7.72372	2006-09-29
Edinburgh, UK	15	49	6.6	58.8	Intercrop (BP)	Winter	0	-	0	133	0	12.09.06 - 02.04.07 (202)	4.0901	0	6.51887	-	187.701	0.929214	2.2545	2.05445	1.99948	1.81755	1.59542	1.20111	5.17919	2006-12-05
Edinburgh, UK	15	49	6.6	58.8	Intercrop (BP)	Winter	0	-	0	136	0	12.09.06 - 02.04.07 (202)	4.0901	0	6.51887	-	321.319	1.59069	5.87512	5.47379	4.31623	3.94343	2.69745	1.82844	6.94202	2006-12-05
Edinburgh, UK	15	49	6.6	58.8	Monocrop (BF)	Winter	0	-	0	27	0	12.09.06 - 02.04.07 (202)	4.0901	0	6.51887	-	201.295	0.996512	2.64645	2.01587	1.90913	1.89452	1.76211	1.31471	5.08113	2007-02-23
Edinburgh, UK	15	49	6.6	58.8	Intercrop (BCF)	Oats	0	-	Apr P, H	0	0	3.04.07 - 11.09.07 (161)	3.69565	0	11.0654	-	8566.26	53.2066	211.231	128.638	117.996	84.8301	68.5802	2.46585	7.13585	2007-07-25
Edinburgh, UK	15	49	6.6	58.8	Intercrop (BP)	Oats	0	-	Apr P, H	0	0	3.04.07 - 11.09.07 (161)	3.69565	0	11.0654	-	976.049	6.06241	17.4355	10.1504	10.0649	7.36637	7.22266	1.78634	5.35218	2007-07-25
Edinburgh, UK	15	49	6.6	58.8	Intercrop (BP)	Oats	0	-	Apr P, H	0	0	3.04.07 - 11.09.07 (161)	3.69565	0	11.0654	-	2294.7	14.2528	33.8693	33.1318	27.6947	18.3084	14.5131	1.47598	5.55703	2007-08-15
Edinburgh, UK	15	49	6.6	58.8	Monocrop (BF)	Oats	0	-	Apr P, H	0	0	3.04.07 - 11.09.07 (161)	3.69565	0	11.0654	-	1308.17	8.12526	30.236	20.2719	18.6393	16.1715	9.95469	2.31133	7.28296	2007-05-15
Edinburgh, UK	15	49	6.6	58.8	Intercrop (BCF)	Winter	0	-	0	37.9	0	12.09.07 - 21.04.08 (222)	3.05586	0	5.40653	-	140.629	0.633463	32.3654	10.9423	9.08684	6.74231	5.66541	23.0148	46.0804	2008-04-04
Edinburgh, UK	15	49	6.6	58.8	Intercrop (BP)	Winter	0	-	0	13.1	0	12.09.07 - 21.04.08 (222)	3.05586	0	5.40653	-	66.9445	0.301552	6.05445	0.93993	0.83993	0.65845	0.141579	9.04399	12.8978	2008-04-04
Edinburgh, UK	15	49	6.6	58.8	Intercrop (BP)	Winter	0	-	0	11.3	0	12.09.07 - 21.04.08 (222)	3.05586	0	5.40653	-	-277.638	-1.25062	16.6975	1.15082	1.05082	-0.506063	-0.924588	-6.01412	-6.29181	2008-04-04
Edinburgh, UK	15	49	6.6	58.8	Monocrop (BF)	Winter	0	-	0	10.6	0	12.09.07 - 21.04.08 (222)	3.05586	0	5.40653	-	137.942	0.621359	12.6464	1.56922	1.36922	-0.0796909	-0.157466	9.16797	11.1262	2008-04-04
Edinburgh, UK	15	49	6.6	58.8	Intercrop (BCF)	perennial raigras	0	-	Apr P, H	0	0	22.04.08 - 30.08.08 (130)	3.77385	0	11.8208	-	1090.54	8.38881	138.266	13.8373	8.08664	3.201	3.13989	12.6786	15.2704	2008-05-02
Edinburgh, UK	15	49	6.6	58.8	Intercrop (BP)	perennial raigras	0	-	Apr P, H	0	0	22.04.08 - 30.08.08 (130)	3.77385	0	11.8208	-	162.905	1.25312	9.39682	5.3422	2.19426	1.49503	1.05231	5.76828	11.9583	2008-05-02
Edinburgh, UK	15	49	6.6	58.8	Intercrop (BP)	perennial raigras	0	-	Apr P, H	0	0	22.04.08 - 30.08.08 (130)	3.77385	0	11.8208	-	397.476	3.05751	26.9606	10.2889	8.05054	4.124	2.97166	6.78295	13.1821	2008-05-02
Edinburgh, UK	15	49	6.6	58.8	Monocrop (BF)	perennial raigras	0	-	Apr P, H	0	0	22.04.08 - 30.08.08 (130)	3.77385	0	11.8208	-	669.197	5.14767	44.4803	26.3934	6.88082	2.92826	1.86561	6.64681	12.3354	2008-06-06
Aberdeen, UK	17	66	5.8	41	Intercrop (BCF)	Spring Barley / white clover	0	+	Apr P, H	?	0	04.07.06 - 23.03.07 (263)	2.19734	0	9.3	-	419.146	1.59371	7.66737	7.45374	5.4517	3.81695	2.03083	1.82929	6.30344	2006-07-12					Pappa et al., 2011
Aberdeen, UK	17	66	5.8	41	Intercrop (BPF)	Spring Barley / pea cv Zero 4	0	+	Apr P, H	?	0	04.07.06 - 23.03.07 (263)	2.19734	0	9.3	-	574	2.18251	12.047	7.92508	6.50676	3.62822	2.84862	2.09878	5.74141	2006-07-12
Aberdeen, UK	17	66	5.8	41	Intercrop (BPG)	Spring Barley / pea cv Zero 4 + GM	green manure	+	Apr P, H	?	0	04.07.06 - 23.03.07 (263)	2.19734	0	9.3	-	521	1.98099	18.4362	8.57059	3.68091	2.34544	2.09265	3.53862	6.742	2006-07-12
Aberdeen, UK	17	66	5.8	41	Monocrop (BF)	Spring Barley	0	-	Apr P, H	?	0	04.07.06 - 23.03.07 (263)	2.19734	0	9.3	-	479	1.82129	7.84434	5.64206	5.20747	3.59479	2.54251	1.63765	5.18396	2006-07-12
Aberdeen, UK	17	66	5.8	41	Monocrop (C)	White Clover	0	+	Apr P, H	?	0	04.07.06 - 23.03.07 (263)	2.19734	0	9.3	-	402	1.52852	7.67897	5.8604	7.25384	2.60027	1.79662	1.91019	6.2662	2006-07-04
Aberdeen, UK	17	66	5.8	41	Monocrop (P)	pea cv Zero 4	0	+	Apr P, H	?	0	04.07.06 - 23.03.07 (263)	2.19734	0	9.3	-	431	1.63878	6.72491	6.47708	5.40092	4.06078	3.38184	1.5603	6.04305	2006-07-04
Aberdeen, UK	17	66	5.8	41	Intercrop (BCF)	Oats	0	-	Apr P, H	?	0	23.03.07 - 30.06.07 (99)	9.99798	0	16.6	-	668	6.74747	21.9633	15.8833	15.4297	4.7284	3.07887	3.28792	9.14425	2007-05-14
Aberdeen, UK	17	66	5.8	41	Intercrop (BPF)	Oats	0	-	Apr P, H	?	0	23.03.07 - 30.06.07 (99)	9.99798	0	16.6	-	373	3.76768	9.23	6.73216	6.32	3.60312	2.79772	2.47453	7.68981	2007-05-14
Aberdeen, UK	17	66	5.8	41	Intercrop (BPG)	Oats	0	-	Apr P, H	?	0	23.03.07 - 30.06.07 (99)	9.99798	0	16.6	-	559	5.64646	13.3721	12.3233	9.18333	3.83309	3.63356	2.39215	7.57521	2007-05-21
Aberdeen, UK	17	66	5.8	41	Monocrop (BF)	Oats	0	-	Apr P, H	?	0	23.03.07 - 30.06.07 (99)	9.99798	0	16.6	-	836	8.44444	25.07	21.21	13.1602	5.56873	3.28798	2.9988	8.16949	2007-05-14
Aberdeen, UK	18	66	5.8	41	Monocrop (C)	Oats	0	-	Apr P, H	?	0	23.03.07 - 30.06.07 (99)	9.99798	0	16.6	-	969.914	9.79711	44.1267	21.2561	15.6633	9.99	8.36716	4.54955	10.2487	2007-05-14
Aberdeen, UK	19	66	5.8	41	Monocrop (P)	Oats	0	-	Apr P, H	?	0	23.03.07 - 30.06.07 (99)	9.99798	0	16.6	-	392.209	3.96171	10.4175	7.54	3.93667	3.62795	2.31631	2.6561	7.09784	2007-05-21
Aberdeen, UK	17	66	5.8	41	GJ/PJ	Spring barley+CC:gras-clover	Residues from 3rd yr grass/clover, sheep grazing to Jan	+	14 Jan 02 and 03 P, 7-11 Apr, rot. H	?	?	03.04.02 - 06.08.03 (490)		0			5007.08	10.2185	84.1997	71.0056	59.7723	40.7737	39.2881	1.68161	5.89245	2003-05-12	80.4	24	25.4	9.5	Ball et al., 2007a
Aberdeen, UK	17	66	5.8	41	GJ/PM	Spring barley+CC:gras-clover	Residues from 3rd yr grass/clover, sheep grazing to Jan	+	26 Mar 02 P, 31 Mar 03 P, 7-11 Apr rot. H	?	?	03.04.02 - 06.08.03 (490)		0			5381.7	10.9831	104.638	69.8714	58.4714	62.5116	45.578	1.94433	6.3376	2003-05-12	81.6	20.4	22.6	9.5
Aberdeen, UK	17	66	5.8	41	GX/PJ	Spring barley+CC:gras-clover	Residues from 3rd yr grass/clover, sheep grazing to Oct	+	14 Jan 02 and 03 P, 7-11 Apr, rot. H	?	?	03.04.02 - 06.08.03 (490)		0			7391.86	15.0854	153.233	112.599	112.885	56.1666	52.0268	2.073	6.58712	2003-05-25	72.8	5.2	10.7	12.9
Aberdeen, UK	17	66	5.8	41	GM/PM	Spring barley+CC:gras-clover	Residues from 3rd yr grass/clover, sheep grazing toMarch	+	26 Mar 02 P, 31 Mar 03 P, 7-11 Apr rot. H	?	?	03.04.02 - 06.08.03 (490)		0			7940.08	16.2042	167.028	99.9907	96.9235	96.0375	92.2771	2.10361	6.95531	2003-05-12	73	27.1	28.9	9.5
Aberdeen, UK	17	66	5.8	41	GX/PJ	Spring barley+CC:gras-clover	Residues from 3rd yr grass/clover, sheep grazing to Oct	+	14 Jan 03 P, 7-11 Apr, rot. H	?	?	23.04.03 -31.05.03 (38)		0			1780	46.8421	297.052	250.334	150.667	148.721	134.705	16.6883	55.1393	2003-05-07	78.2	49.1	30.9	10
Aberdeen, UK	17	66	5.8	41	GM/PM	Spring barley+CC:gras-clover	Residues from 3rd yr grass/clover, sheep grazing toMarch	+	31 Mar 03 P, 7-11 Apr rot. H	?	?	23.04.03 -31.05.03 (38)		0			1940	51.0526	133.927	124.583	121.079	114.461	113.682	6.90343	31.3263	2003-05-06	75.8	36.6	45.2	10
Ås, NO	35	22	6.2	17.4	G-3M	Grass-clover	Residues from 3 times mulched grass-clover cuts	+		69+48+76	0	26.05.09-15.12.09 (204)	4.55882	26 Jun,2 Jul	10.6	-	3260	15.9804	46.7271	41.2718	36.1357	35.3828	34.4096	1.43335	5.94868	2009-06-27	82.8036	0.514409	7.14677	16.7	Nadim et al., 2012
Ås, NO	35	22	6.2	17.4	G-0M	Grass-clover	0: 3 cuts grass-clover removed	+		0	0	26.05.09-15.12.09 (204)	4.55882	26 Jun,2 Jul	10.6	-	3050	14.951	41.1414	33.9451	32.8693	29.6039	26.4877	1.3489	5.37861	2009-06-27	64.3945	0.702	7.91899	16.7
Ås, NO	35	22	6.2	17.4	G-0M(B)	Grass-clover	0: 3 cuts grass-clover removed	+		0	0	26.05.09-15.12.09 (204)	4.55882	26 Jun,2 Jul	10.6	-	2730	13.3824	36.6415	31.2113	31.1053	27.5239	25.7703	1.34218	5.577	2009-06-27	64.3945	0.702	7.91899	16.7
Ås, NO	35	22	6.2	17.4	G-1M	Grass-clover	Residues from last grass-clover cut mulched, 2 removed	+		79	0	26.05.09-15.12.09 (204)	4.55882	26 Jun,2 Jul	10.6	-	3310	16.2255	45.3545	39.9912	37.3668	34.5255	29.4931	1.37023	5.64142	2009-06-27	64.3945	0.699353	7.21978	16.7
Ås, NO	35	22	6.2	17.4	C-(B)	Oats	0	-		0	0	26.05.09-15.12.09 (204)	4.55882	26 Jun,2 Jul	10.6	-	2190	10.7353	39.2413	34.752	25.3238	23.5218	16.4638	1.79184	6.36085	2009-06-27	67.2495	2.51561	5.55446	16.7
Ås, NO	35	22	6.2	17.4	C-(M)	Oats	0	-		0	0	26.05.09-15.12.09 (204)	4.55882	26 Jun,2 Jul	10.6	-	2630	12.8922	41.0491	38.9507	33.3179	24.1485	20.5756	1.5608	6.00919	2009-06-27	67.2495	2.51561	5.55446	16.7
Ås, NO	35	22	6.2	17.4	G-3M	Barley	Ploughed 1 yr grass-clover ley, mulch included	+	23 Apr 10 P, 12 May H	?	0	07.04.10-15.09.10 (218)	1.94495	29 Jun,9 Jul	12.3716	-	4700	21.5596	76.084	73.8433	53.0125	44.412	32.3489	1.61881	5.95108	2010-05-26	78.7467	23.5474	24.3291	11.6
Ås, NO	35	22	6.2	17.4	G-0M	Barley	Ploughed 1 yr grass-clover ley	+	23 Apr 10 P, 12 May H	?	0	07.04.10-15.09.10 (218)	1.94495	29 Jun,9 Jul	12.3716	-	4670	21.422	94.4418	51.8325	44.6265	32.6171	27.6662	2.02231	5.37867	2010-05-26	77.7731	25.6873	16.913	11.6
Ås, NO	35	22	6.2	17.4	G-0M(B)	Barley	Ploughed 1 yr grass-clover ley+ biogas residue	+	23 Apr 10 P, 12 May H	?	110	07.04.10-15.09.10 (218)	1.94495	29 Jun,9 Jul	12.3716	-	3490	16.0092	78.728	32.5751	25.4304	19.3312	9.57905	2.25582	4.74624	2010-05-26	81.8175	21.8649	31.8585	11.6
Ås, NO	35	22	6.2	17.4	G-1M	Barley	Ploughed 1 yr grass-clover ley, 1 cut mulch included	+	23 Apr 10 P, 12 May H	?	0	07.04.10-15.09.10 (218)	1.94495	29 Jun,9 Jul	12.3716	-	3890	17.844	71.2738	52.9162	44.4032	29.5151	26.7868	1.83223	5.78137	2010-09-15	74.0195	5.93724	23.0132	13.6
Ås, NO	35	22	6.2	17.4	C-(B)	Barley	biogas residue	-	23 Apr 10 P, 12 May H	0	110	07.04.10-15.09.10 (218)	1.94495	29 Jun,9 Jul	12.3716	-	3730	17.1101	82.5301	35.3218	26.8509	17.9185	17.5119	2.2126	4.82931	2010-05-26	74.3387	30.8084	47.592	11.6
Ås, NO	35	22	6.2	17.4	C-(M)	Barley	0	-	23 Apr 10 P, 12 May H	0	80	07.04.10-15.09.10 (218)	1.94495	29 Jun,9 Jul	12.3716	-	3150	14.4495	64.9742	37.872	25.0817	21.4731	15.5923	2.06267	5.23788	2010-05-26	73.9228	17.851	73.4735	11.6
Abbreviations: CS = Cattle Slurry, CCM = composted cattle manure, PS = Pig slurry, P=ploughing, H = Harrowing, CCinc= Cover crop incorporated, CCs= Cover Crop under sown, CCh = cover crop harvested

## Sheet: S3-Leaching
Crop	Pre-crop	Crop sequence	Soil mineral N, kg ha-1 ,0-0.9 m depth	Total N leached, kg N ha-1 yr-1	NO3-N leached, kg ha-1 yr-1	Total N applied, kg ha-1 yr-1	Soil type	Site	Comment	Reference
Potatoes	Green manure			75			Sandy soil	Mellby, Sweden	Low potato yields	Torstensson et al. 2006
Potatoes	Pea/barley with catch crop			98
		Oat/green manure/s. wheat/oat/green manure/potato		34		0			Soil mineral N peak > 150kg N/ha, especially after manure application and after breaking of green manure crops
		S. barley/clover-grass/clover-grass/oat and green manure/pea-barley and green manure/potato		39		0-140
		Clover-grass/clover-grass/w. wheat/faba bean/s. barley/oat and clover-grass	April 19-50/Nov 11-33	7.4		51-132	Clay soil	Mellby, Sweden	Plot 62 and 65 are presented in Neumann et al. (2011)	Aronsson et al. 2007
		S. wheat/green manure/w. wheat/faba bean/oats/green manure	April 19-43/Nov 12-31	11		0			Increased leacing after the faba bean crop
		Clover-grass/w. wheat/pea or faba bean/s. barley/clover-grass/clover-grass		6.8 (2.2-11.1)	4.8	60-180	Clay soil	Lanna, Sweden	Leaching: w. wheat > bare fallow (in winters following a crop) > grass-clover ley. Highest in bare fallow after broad bean and w. wheat.	Neumann et al. 2011
				9.1 (4.5-13.2)	6.4	0
		W. rye/faba bean/s. wheat/2 yrs grass-clover ley. Or: w. oilseed rape/w. wheat/ley/oats/ley	Harvest 19/Nov 37/April 41	14.3-21.5	10.8-16.4	22-74	Clay soil	Logården, Sweden	Average N added over a 4 year period inluding BNF	Stenberg et al. 2012
Lupin	W. cereals				270		Coarse sand, loamy sand and sandy loam	Jyndevad, Foulum and Flakkebjerg, Denmark	Significant lower leaching when catch crops were used. No difference between systems with manure or green manure. Increased leaching with number of cultivations in autumn.	Askegaard et al. 2011
		S. barley/grass-clover ley/w. wheat/pea and s. barley			97/84/59	100
		S. barley/grass-clover ley/w. cereals/lupin			47/36/34	100
		S. barley/grass-clover ley/potato/w. wheat			32/24/24	280
Pasture		Pasture 5 yrs		9-64		0-83	Sand and sandy soils	Brørup and Assentoft, Denmark	Farm investigation and FASSET model simulations.	Berntsen et al. 2006
S. barley	Pasture	Pasture 4 yrs/s. barley		63-216
S. barley	S. barley	Pasture 3 yrs /s. barley/s.barley		61-235
		Different crop sequences with arable crops (cereals and legumes)		14-50		0-200	Calcareous soils	Seine Basin, France	Higest leaching from crops fertilised in fall or after legumes. Lowest from alfalfa leys.	Benoit et al. 2014
		S. barley/grass-clover/s. wheat and cover crops/oats and peas		29.3		0	Loam and silty sand	Apelsvoll, Norway	Data includes runoff	Korsaeth 2012
S. triticale	S. barley	Maize/w. triticale/s. barley/s. triticale			105.2-106	100	Sandy soil, loamy soil under 70 cm depth	Bakenhus, Germany	Significant effect of crop rotation but not on the last crop	Kayser et al. 2010
S. triticale	S. barley	Maize/w. triticale/s. barley/s. triticale			77.6-93.1	200
S. triticale	W. triticale	Grass-clover/s. barley/w. triticale/s.triticale			74-90.3	0
S. triticale	S. barley	Field bean/w. triticale/s. barley/s. triticale			78.3-84.4	0
S. triticale	S. barley	Maize/w. triticale/s. barley/s. triticale			63.6-69.2	0
S. triticale	3-year ley	3-year ley (0-50% clover)/s. triticale			115.3-126.0	0
Grass 1st yr	Arable crops			36 (1-114)		60-70	Sandy loam and clay loam	Wiltshire, Shropshire and Gloucestershire, England	Farm investigation (5-17 years)	Stopes et al. 2002
Grass	Grass			11 (0-52)		60-70
Arable crops	Grass			82 (8-187)		60-70
Arable crops 2nd yr	Arable crops 1st yr			50 (7-182)		60-70
Arable crops 3rd yr	Arable crops 2nd yr			70 (9-145)		60-70
